# Supplementary material
Source: PubMed Central journal article supplement (PMC4000289)
Supplement: NIHMS535382-supplement-01.pdf [file NIHMS535382-supplement-01.pdf]

## Supplemental Table 1

| Probe Set ID | Gene Symbol   | relative expression |
|--------------|---------------|---------------------|
| 10406519     | Hapln1        | 9.26                |
| 10405047     | Aspn          | 9.06                |
| 10536363     | Tac1          | 6.99                |
| 10606369     | Itm2a         | 6.98                |
| 10583071     | Mmp3          | 6.85                |
| 10440091     | Col8a1        | 6.74                |
| 10521537     | 4Cyt11        | 6.48                |
| 10492798     | Sfrp2         | 6.44                |
| 10406504     | Edil3         | 6.11                |
| 10601942     | Nrk           | 5.86                |
| 10552064     | Krtdap        | 5.79                |
| 10384223     | Igfbp3        | 5.60                |
| 10554249     | Acan          | 5.56                |
| 10345921     | 1500015O10Rik | 5.41                |
| 10487040     | Fbn1          | 5.39                |
| 10593123     | Tagln         | 5.31                |
| 10379518     | Ccl7          | 5.28                |
| 10347277     | Igfbp2        | 4.97                |
| 10365991     | Epyc          | 4.78                |
| 10606366     | Zcchc5        | 4.74                |
| 10407327     | Emb           | 4.65                |
| 10587315     | Gsta4         | 4.63                |
| 10409579     | Cxcl14        | 4.63                |
| 10471567     | C130021I20Rik | 4.55                |
| 10439895     | Alcam         | 4.53                |
| 10435641     | Fstl1         | 4.46                |
| 10531724     | Plac8         | 4.45                |
| 10585438     | Crabp1        | 4.28                |
| 10351293     | Dpt           | 4.23                |
| 10398319     | Dlk1          | 4.20                |
| 10424119     | Nov           | 4.17                |
| 10376778     | Mfap4         | 4.11                |
| 10344897     | Sulf1         | 4.02                |
| 10584628     | Thy1          | 4.01                |
| 10555323     | P4ha3         | 3.95                |
| 10453057     | Cyp1b1        | 3.93                |
| 10469066     | Ccdc3         | 3.91                |
| 10601412     | Lpar4         | 3.83                |
| 10417212     | Itgbl1        | 3.81                |
| 10477920     | Myl9          | 3.80                |
| 10543959     | Ptn           | 3.77                |
| 10411229     | F2r           | 3.74                |
| 10447951     | Thbs2         | 3.72                |
| 10492021     | Postn         | 3.69                |
| 10601648     | Tnmd          | 3.65                |

| Probe Set ID | Gene Symbol   | relative expression |
|--------------|---------------|---------------------|
| 10569341     | H19           | 3.59                |
| 10396476     | Rhoj          | 3.57                |
| 10492448     | Ptx3          | 3.54                |
| 10458999     | Fbn2          | 3.47                |
| 10561187     | Mia1          | 3.46                |
| 10541075     | Cxcl12        | 3.46                |
| 10537062     | Mest          | 3.44                |
| 10474700     | Thbs1         | 3.43                |
| 10559790     | Zim1          | 3.37                |
| 10436304     | Abi3bp        | 3.36                |
| 10439710     | Phldb2        | 3.35                |
| 10418193     | Plac9         | 3.32                |
| 10503659     | Epha7         | 3.30                |
| 10421853     | Lect1         | 3.30                |
| 10365559     | Igf1          | 3.28                |
| 10545707     | Actg2         | 3.24                |
| 10536444     | Foxp2         | 3.22                |
| 10410931     | Vcan          | 3.19                |
| 10406845     | Foxd1         | 3.17                |
| 10541496     | Mfap5         | 3.16                |
| 10594066     | Loxl1         | 3.14                |
| 10374777     | Efemp1        | 3.13                |
| 10519886     | Sema3c        | 3.11                |
| 10506488     | Ppap2b        | 3.10                |
| 10364149     | S100b         | 3.09                |
| 10398075     | Serpina3n     | 3.08                |
| 10456018     | Arsi          | 3.07                |
| 10360391     | Ifi203        | 3.07                |
| 10501608     | Vcam1         | 3.06                |
| 10409314     | Msx2          | 3.04                |
| 10511363     | Penk1         | 3.03                |
| 10502081     | Enpep         | 3.00                |
| 10358664     | Hmcn1         | 2.98                |
| 10583809     | Cnn1          | 2.97                |
| 10559796     | Peg3          | 2.96                |
| 10601846     | 2900062L11Rik | 2.96                |
| 10439009     | Apod          | 2.95                |
| 10607848     | Egfl6         | 2.94                |
| 10576051     | Foxc2         | 2.94                |
| 10367634     | Akap12        | 2.94                |
| 10429564     | Ly6a          | 2.93                |
| 10588037     | Rbp1          | 2.93                |
| 10429568     | Ly6c1         | 2.92                |
| 10490818     | Stmn2         | 2.88                |
| 10601848     | 6530401D17Rik | 2.86                |

| Probe Set ID | Gene Symbol   | relative expression |
|--------------|---------------|---------------------|
| 10455954     | EG240327      | 2.85                |
| 10398326     | Meg3          | 2.83                |
| 10592420     | AW551984      | 2.82                |
| 10455961     | ligp1         | 2.81                |
| 10348240     | 3110079O15Rik | 2.81                |
| 10398362     | Rian          | 2.80                |
| 10542470     | Mgst1         | 2.79                |
| 10402347     | Ifi27         | 2.78                |
| 10422728     | Dab2          | 2.77                |
| 10505489     | Pappa         | 2.77                |
| 10578649     | Odz3          | 2.76                |
| 10424140     | Col14a1       | 2.74                |
| 10467013     | Prkg1         | 2.73                |
| 10423080     | C1qtnf3       | 2.72                |
| 10599348     | Gria3         | 2.66                |
| 10576639     | Nrp1          | 2.66                |
| 10471067     | Prrx2         | 2.65                |
| 10367982     | Gpr126        | 2.63                |
| 10469457     | Plxdc2        | 2.61                |
| 10357870     | Prelp         | 2.61                |
| 10399691     | Id2           | 2.59                |
| 10531994     | Mpa2l         | 2.58                |
| 10407126     | Plk2          | 2.55                |
| 10401527     | Ltbp2         | 2.54                |
| 10439299     | Stfa3         | 2.52                |
| 10414025     | Gdf10         | 2.52                |
| 10508676     | Matn1         | 2.51                |
| 10569429     | Cdkn1c        | 2.50                |
| 10447649     | Fndc1         | 2.49                |
| 10467124     | Acta2         | 2.48                |
| 10374366     | Egfr          | 2.48                |
| 10536294     | Peg10         | 2.47                |
| 10350516     | Ptgs2         | 2.46                |
| 10482181     | Strbp         | 2.46                |
| 10569344     | Igf2          | 2.46                |
| 10551852     | Clip3         | 2.46                |
| 10530841     | Igfbp7        | 2.45                |
| 10395103     | Pxdn          | 2.45                |
| 10359280     | Pappa2        | 2.45                |
| 10542575     | Pde3a         | 2.44                |
| 10359689     | Atp1b1        | 2.44                |
| 10577164     | Gas6          | 2.43                |
| 10439514     | Gap43         | 2.43                |
| 10595695     | Zic1          | 2.42                |
| 10606835     | Bex2          | 2.40                |

| Probe Set ID | Gene Symbol        | relative expression |
|--------------|--------------------|---------------------|
| 10352905     | Cd34               | 2.40                |
| 10372028     | Plxnc1             | 2.40                |
| 10397633     | Flrt2              | 2.39                |
| 10344990     | Crispld1           | 2.39                |
| 10604542     | Hs6st2             | 2.38                |
| 10403584     | Nid1               | 2.38                |
| 10571567     | Sorbs2             | 2.37                |
| 10512499     | Tpm2               | 2.37                |
| 10346015     | Col3a1             | 2.36                |
| 10400967     | Six1               | 2.36                |
| 10498309     | Pfn2               | 2.36                |
| 10455901     | Slc27a6            | 2.32                |
| 10362186     | Moxd1              | 2.30                |
| 10401673     | Tgfb3              | 2.30                |
| 10543939     | BC064033           | 2.29                |
| 10606868     | Bex1               | 2.29                |
| 10362091     | Raet1d             | 2.28                |
| 10502778     | Lphn2              | 2.27                |
| 10436945     | Slc5a3             | 2.26                |
| 10577315     | Angpt2             | 2.25                |
| 10363541     | Ass1               | 2.24                |
| 10507101     | OTTMUSG00000008561 | 2.24                |
| 10594044     | Islr               | 2.24                |
| 10432045     | Col2a1             | 2.23                |
| 10481845     | Fam125b            | 2.23                |
| 10394488     | Matn3              | 2.22                |
| 10488378     | Thbd               | 2.22                |
| 10394534     | Osr1               | 2.22                |
| 10529651     | Msx1               | 2.22                |
| 10509901     | Mfap2              | 2.21                |
| 10496125     | Dkk2               | 2.20                |
| 10584208     | Cdon               | 2.20                |
| 10477169     | Id1                | 2.19                |
| 10492682     | 1110032E23Rik      | 2.17                |
| 10410766     | Nr2f1              | 2.16                |
| 10485198     | Tspan18            | 2.15                |
| 10550388     | Gng8               | 2.15                |
| 10345777     | Il1rl2             | 2.14                |
| 10540085     | Fbln2              | 2.13                |
| 10453394     | Six2               | 2.13                |
| 10546661     | Foxp1              | 2.13                |
| 10367772     | Samd5              | 2.13                |
| 10522749     | Lphn3              | 2.13                |
| 10489759     | Sulf2              | 2.12                |
| 10598626     | Tspan7             | 2.12                |

| Probe Set ID | Gene Symbol | relative expression |
|--------------|-------------|---------------------|
| 10366746     | Lrig3       | 2.12                |
| 10485070     | Mdk         | 2.11                |
| 10548892     | Arhgdib     | 2.11                |
| 10506050     | Nfia        | 2.11                |
| 10359870     | Pbx1        | 2.10                |
| 10427796     | Npr3        | 2.10                |
| 10361771     | Plagl1      | 2.09                |
| 10494351     | Mtmr11      | 2.09                |
| 10461148     | Snhg1       | 2.09                |
| 10385248     | Hmmr        | 2.09                |
| 10583008     | Casp12      | 2.08                |
| 10405063     | Ogn         | 2.07                |
| 10533050     | Hspb8       | 2.07                |
| 10382328     | Sox9        | 2.07                |
| 10454632     | Camk4       | 2.06                |
| 10404407     | Foxc1       | 2.05                |
| 10536845     | Flnc        | 2.04                |
| 10348739     | Sned1       | 2.03                |
| 10424082     | Aard        | 2.02                |
| 10445237     | LOC627626   | 2.02                |
| 10359908     | Rgs4        | 2.02                |
| 10583207     | Maml2       | 2.01                |
| 10483401     | Spc25       | 2.01                |
| 10531177     | Adamts3     | 2.01                |
| 10478698     | Eya2        | 2.01                |
| 10504424     | Reck        | 2.00                |
| 10599927     | Aff2        | 1.99                |
| 10399908     | Prkar2b     | 1.99                |
| 10427895     | Basp1       | 1.99                |
| 10429515     | Lynx1       | 1.99                |
| 10481540     | Fnbp1       | 1.99                |
| 10529656     | Nsg1        | 1.98                |
| 10498386     | Igsf10      | 1.97                |
| 10530870     | Epha5       | 1.97                |
| 10366346     | Phlda1      | 1.97                |
| 10452419     | Efna5       | 1.97                |
| 10375360     | Ebf1        | 1.97                |
| 10408557     | Serpinb1a   | 1.96                |
| 10568536     | Cpxm2       | 1.95                |
| 10515836     | Ccnb1       | 1.95                |
| 10599001     | Agtr2       | 1.94                |
| 10362201     | Ctgf        | 1.94                |
| 10368409     | Lama2       | 1.94                |
| 10519815     | Cacna2d1    | 1.93                |
| 10422244     | Slitrk6     | 1.92                |

| Probe Set ID | Gene Symbol   | relative expression |
|--------------|---------------|---------------------|
| 10576973     | Col4a1        | 1.91                |
| 10399725     | Sox11         | 1.91                |
| 10423836     | Cthrc1        | 1.90                |
| 10362538     | Lama4         | 1.90                |
| 10433114     | Itga5         | 1.90                |
| 10484371     | Calcl         | 1.89                |
| 10436623     | Chodl         | 1.89                |
| 10540122     | Slc6a6        | 1.89                |
| 10476969     | Pygb          | 1.88                |
| 10571142     | Gpr124        | 1.88                |
| 10369154     | Man1a         | 1.88                |
| 10547740     | C1s           | 1.87                |
| 10491732     | Fat4          | 1.87                |
| 10535231     | Ttyh3         | 1.87                |
| 10564527     | Nr2f2         | 1.87                |
| 10344803     | Cspp1         | 1.86                |
| 10416230     | Tnfrsf10b     | 1.86                |
| 10514255     | Mlit3         | 1.86                |
| 10376950     | Pmp22         | 1.86                |
| 10513208     | Svep1         | 1.85                |
| 10599581     | 2610018G03Rik | 1.85                |
| 10496494     | Tspan5        | 1.85                |
| 10435948     | Ccdc80        | 1.85                |
| 10460541     | Cd248         | 1.85                |
| 10346607     | Fzd7          | 1.85                |
| 10417176     | Zic2          | 1.84                |
| 10439612     | Boc           | 1.84                |
| 10346150     | Tmeff2        | 1.84                |
| 10486102     | Gpr176        | 1.84                |
| 10368495     | Rspo3         | 1.83                |
| 10522288     | Shisa3        | 1.83                |
| 10366293     | Csrp2         | 1.83                |
| 10451547     | LOC100043385  | 1.83                |
| 10394498     | Wdr35         | 1.82                |
| 10521972     | Pcdh7         | 1.82                |
| 10557156     | Plk1          | 1.82                |
| 10369688     | Tet1          | 1.81                |
| 10360985     | Cenpf         | 1.81                |
| 10419288     | Gch1          | 1.81                |
| 10436941     | Mrps6         | 1.80                |
| 10570957     | Sfrp1         | 1.80                |
| 10529977     | Ppargc1a      | 1.80                |
| 10472321     | Slc4a10       | 1.79                |
| 10496580     | Gbp3          | 1.79                |
| 10402211     | Fbln5         | 1.79                |

| Probe Set ID | Gene Symbol   | relative expression |
|--------------|---------------|---------------------|
| 10504106     | Il11ra1       | 1.79                |
| 10427862     | Cdh6          | 1.79                |
| 10350753     | Glul          | 1.78                |
| 10399588     | Zfp125        | 1.77                |
| 10476314     | Prnp          | 1.77                |
| 10356333     | Snord82       | 1.76                |
| 10434291     | B3gnt5        | 1.76                |
| 10355893     | Epha4         | 1.76                |
| 10358816     | Lamc1         | 1.76                |
| 10487645     | Cpxm1         | 1.76                |
| 10384885     | Spnb2         | 1.75                |
| 10595560     | Tbx18         | 1.75                |
| 10595211     | Col12a1       | 1.75                |
| 10457587     | Zfp521        | 1.75                |
| 10446376     | Man2a1        | 1.75                |
| 10377319     | Myh10         | 1.74                |
| 10371770     | Gas2l3        | 1.74                |
| 10496204     | Cenpe         | 1.73                |
| 10514177     | Bnc2          | 1.73                |
| 10433776     | Snai2         | 1.73                |
| 10366266     | Pawr          | 1.72                |
| 10571444     | Slc7a2        | 1.72                |
| 10556076     | Olfml1        | 1.72                |
| 10477187     | Tpx2          | 1.71                |
| 10346365     | Sgol2         | 1.71                |
| 10346348     | 2810022L02Rik | 1.70                |
| 10345101     | Col9a1        | 1.70                |
| 10381298     | Ramp2         | 1.69                |
| 10594774     | Ccnb2         | 1.69                |
| 10572024     | Spock3        | 1.69                |
| 10462796     | Kif11         | 1.69                |
| 10514939     | Podn          | 1.68                |
| 10594251     | Kif23         | 1.67                |
| 10604743     | Snord61       | 1.67                |
| 10455761     | Prdm6         | 1.67                |
| 10586118     | Calml4        | 1.67                |
| 10515090     | Cdkn2c        | 1.66                |
| 10604576     | Gpc3          | 1.66                |
| 10445325     | Rcan2         | 1.66                |
| 10359571     | Fmo1          | 1.66                |
| 10539263     | Loxl3         | 1.66                |
| 10482434     | Gtdc1         | 1.66                |
| 10485963     | Arhgap11a     | 1.65                |
| 10442037     | Zfp97         | 1.65                |
| 10522503     | Pdgfra        | 1.65                |

| Probe Set ID | Gene Symbol        | relative expression |
|--------------|--------------------|---------------------|
| 10562657     | EG434179           | 1.65                |
| 10403108     | Hmgn2              | 1.65                |
| 10493449     | Thbs3              | 1.65                |
| 10370000     | Gstt1              | 1.65                |
| 10385271     | Ccng1              | 1.65                |
| 10580795     | Ccdc102a           | 1.64                |
| 10562251     | Scn1b              | 1.64                |
| 10554938     | Rab30              | 1.64                |
| 10403464     | Dip2c              | 1.64                |
| 10351039     | Gas5               | 1.63                |
| 10519857     | Hgf                | 1.63                |
| 10519998     | Lrrc17             | 1.62                |
| 10580056     | ENSMUSG00000074219 | 1.62                |
| 10497122     | Depdc1a            | 1.62                |
| 10358476     | Prg4               | 1.62                |
| 10466800     | Pgm5               | 1.62                |
| 10364950     | Gadd45b            | 1.62                |
| 10395409     | Meox2              | 1.62                |
| 10542677     | Etnk1              | 1.62                |
| 10499870     | Lor                | 1.61                |
| 10454709     | Kif20a             | 1.61                |
| 10606902     | 4930488E11Rik      | 1.60                |
| 10496519     | Unc5c              | 1.60                |
| 10399360     | Rhob               | 1.60                |
| 10601878     | Tceal1             | 1.59                |
| 10569714     | Cacng7             | 1.59                |
| 10601844     | Bhlhb9             | 1.58                |
| 10434758     | St6gal1            | 1.58                |
| 10356172     | 5033414K04Rik      | 1.58                |
| 10546725     | Pdzrn3             | 1.57                |
| 10400984     | Tmem30b            | 1.55                |
| 10558150     | Htra1              | 1.54                |
| 10528008     | Steap2             | 1.54                |
| 10408600     | Serpinb6a          | 1.54                |
| 10414527     | Pnp2               | 1.54                |
| 10452556     | Rab12              | 1.54                |
| 10375065     | Sh3pxd2b           | 0.65                |
| 10489204     | Tgm2               | 0.65                |
| 10577792     | Plekha2            | 0.64                |
| 10388488     | Fam101b            | 0.63                |
| 10502240     | Npnt               | 0.63                |
| 10446763     | Lbh                | 0.63                |
| 10413609     | Mustn1             | 0.62                |
| 10366848     | B4galnt1           | 0.62                |
| 10570516     | Kbtbd11            | 0.61                |

| Probe Set ID | Gene Symbol | relative expression |
|--------------|-------------|---------------------|
| 10484894     | Ptprj       | 0.61                |
| 10499108     | Glt28d2     | 0.61                |
| 10436442     | Fam60a      | 0.61                |
| 10460237     | Unc93b1     | 0.61                |
| 10381809     | Itgb3       | 0.61                |
| 10388545     | Abr         | 0.60                |
| 10502156     | Ccdc109b    | 0.60                |
| 10359034     | Qsox1       | 0.60                |
| 10603051     | Ap1s2       | 0.59                |
| 10535043     | Pdgfa       | 0.59                |
| 10437639     | Emp2        | 0.58                |
| 10567355     | Gprc5b      | 0.58                |
| 10354588     | Stk17b      | 0.57                |
| 10595840     | Acpl2       | 0.57                |
| 10451061     | Runx2       | 0.57                |
| 10348829     | Farp2       | 0.57                |
| 10544523     | Rny1        | 0.57                |
| 10435305     | Itgb5       | 0.57                |
| 10562211     | Fxyd1       | 0.57                |
| 10388194     | Spns2       | 0.57                |
| 10425116     | Cdc42ep1    | 0.56                |
| 10483081     | Fap         | 0.56                |
| 10587733     | Ctsh        | 0.56                |
| 10415857     | Fam167a     | 0.56                |
| 10436978     | Cbr3        | 0.55                |
| 10421361     | Bmp1        | 0.55                |
| 10569618     | Ano1        | 0.55                |
| 10585778     | Sema7a      | 0.55                |
| 10440376     | Lipi        | 0.55                |
| 10366951     | Ndufa4l2    | 0.55                |
| 10428604     | Tnfrsf11b   | 0.54                |
| 10455826     | Megf10      | 0.54                |
| 10550877     | Kcnn4       | 0.54                |
| 10560685     | Bcl3        | 0.54                |
| 10556381     | Mical2      | 0.54                |
| 10554789     | Ctsc        | 0.54                |
| 10372177     | Tmtc2       | 0.53                |
| 10414360     | Lgals3      | 0.53                |
| 10444883     | Cdsn        | 0.53                |
| 10376201     | Gpx3        | 0.53                |
| 10358299     | EG214403    | 0.53                |
| 10404059     | Hist1h1c    | 0.53                |
| 10501586     | S1pr1       | 0.53                |
| 10372648     | Lyz2        | 0.52                |
| 10380501     | Dlx3        | 0.52                |

| Probe Set ID | Gene Symbol   | relative expression |
|--------------|---------------|---------------------|
| 10447006     | Vit           | 0.52                |
| 10410039     | Ptch1         | 0.51                |
| 10355984     | Serpine2      | 0.51                |
| 10459730     | Me2           | 0.51                |
| 10571274     | Gsr           | 0.51                |
| 10522946     | Ambn          | 0.51                |
| 10434698     | Fetub         | 0.51                |
| 10474915     | Gchfr         | 0.51                |
| 10503188     | Chd7          | 0.50                |
| 10386020     | Slc36a2       | 0.50                |
| 10500808     | Olfml3        | 0.50                |
| 10392464     | Fam20a        | 0.50                |
| 10505008     | Slc44a1       | 0.49                |
| 10474229     | Cd59a         | 0.49                |
| 10509030     | Runx3         | 0.49                |
| 10538150     | Tmem176a      | 0.48                |
| 10587616     | Prss35        | 0.48                |
| 10351400     | Fam78b        | 0.48                |
| 10421810     | 1190002H23Rik | 0.48                |
| 10485117     | Creb3l1       | 0.47                |
| 10456184     | Apcdd1        | 0.47                |
| 10499363     | Bglap1        | 0.47                |
| 10517587     | Alpl          | 0.47                |
| 10464471     | Gal           | 0.46                |
| 10500327     | Hist2h3c2     | 0.46                |
| 10503098     | Lyn           | 0.46                |
| 10428857     | Mtss1         | 0.45                |
| 10410460     | 3110006E14Rik | 0.45                |
| 10551185     | Tgfb1         | 0.45                |
| 10523506     | Bmp3          | 0.44                |
| 10407955     | Epdr1         | 0.44                |
| 10595094     | 2310046A06Rik | 0.43                |
| 10552919     | Hrc           | 0.43                |
| 10476395     | Bmp2          | 0.43                |
| 10467768     | Loxl4         | 0.42                |
| 10423520     | Sema5a        | 0.42                |
| 10529034     | Cgref1        | 0.42                |
| 10389617     | Ppm1e         | 0.41                |
| 10433003     | Sp7 (Osterix) | 0.41                |
| 10597239     | Pth1r         | 0.41                |
| 10471424     | Fam102a       | 0.41                |
| 10483249     | Galnt3        | 0.40                |
| 10345675     | Npas2         | 0.40                |
| 10489569     | Pltp          | 0.40                |
| 10603492     | Porcn         | 0.40                |

| Probe Set ID | Gene Symbol   | relative expression |
|--------------|---------------|---------------------|
| 10466712     | Mamdc2        | 0.40                |
| 10403842     | Elmo1         | 0.40                |
| 10404053     | Hist1h2bc     | 0.40                |
| 10603485     | Ebp           | 0.40                |
| 10523717     | Spp1          | 0.40                |
| 10369388     | Unc5b         | 0.39                |
| 10581479     | Smpd3         | 0.39                |
| 10402705     | Gm266         | 0.39                |
| 10509992     | Hspb7         | 0.38                |
| 10489878     | Ptgis         | 0.37                |
| 10406434     | Mef2c         | 0.37                |
| 10593499     | AI593442      | 0.37                |
| 10583044     | Mmp13         | 0.36                |
| 10492355     | Mme           | 0.36                |
| 10389022     | Myo1d         | 0.36                |
| 10601659     | Srpx2         | 0.36                |
| 10430425     | Lgals2        | 0.36                |
| 10401891     | Ston2         | 0.36                |
| 10457644     | Cdh2          | 0.36                |
| 10571715     | Enpp6         | 0.36                |
| 10385776     | Tcf7          | 0.34                |
| 10360406     | Ifi205        | 0.33                |
| 10576581     | Kcnk1         | 0.33                |
| 10536667     | Ptprz1        | 0.33                |
| 10591135     | Fat3          | 0.32                |
| 10418092     | A830039N20Rik | 0.31                |
| 10508614     | Fabp3         | 0.31                |
| 10523693     | Dmp1          | 0.30                |
| 10606016     | Il2rg         | 0.30                |
| 10525989     | Gpr133        | 0.28                |
| 10418053     | Kcnma1        | 0.27                |
| 10382435     | Gprc5c        | 0.26                |
| 10439651     | Cd200         | 0.26                |
| 10422822     | Lifr          | 0.25                |
| 10354777     | Satb2         | 0.25                |
| 10380566     | Phospho1      | 0.25                |
| 10607499     | Phex          | 0.23                |
| 10388160     | Slc13a5       | 0.22                |
| 10490913     | Car3          | 0.21                |
| 10523701     | Ibsp          | 0.19                |
| 10502224     | Sgms2         | 0.19                |
| 10592355     | Panx3         | 0.19                |
| 10405058     | Omd           | 0.18                |
| 10358339     | Cfh           | 0.16                |
| 10569011     | Ifitm5        | 0.16                |
| 10403834     | Sfrp4         | 0.15                |
| 10499358     | Bglap2        | 0.14                |
